# Supplementary material for: Sequestration of G3BP coupled with efficient translation inhibits stress granules in Semliki Forest virus infection
Source: PubMed Central journal article supplement — Mol Biol Cell. 2012 Dec 15;23(24):4701–12. doi: 10.1091/mbc.E12-08-0619 (PMC3521679; doi:10.1091/mbc.e12-08-0619), 2012-12-15
Supplement: supp_E12-08-0619_CombinedSupMats.pdf [file supp_E12-08-0619_CombinedSupMats.pdf]

1    **Supplemental Material**

2

3    **Sequestration of G3BP coupled with efficient translation inhibits stress**  
4    **granules in SFV infection**

5

6    Marc D. Panas, Margus Varjak, Aleksei Lulla, Kai Er Eng, Andres Merits, Gunilla B.  
7    Karlsson Hedestam and Gerald M. McInerney.

8

8

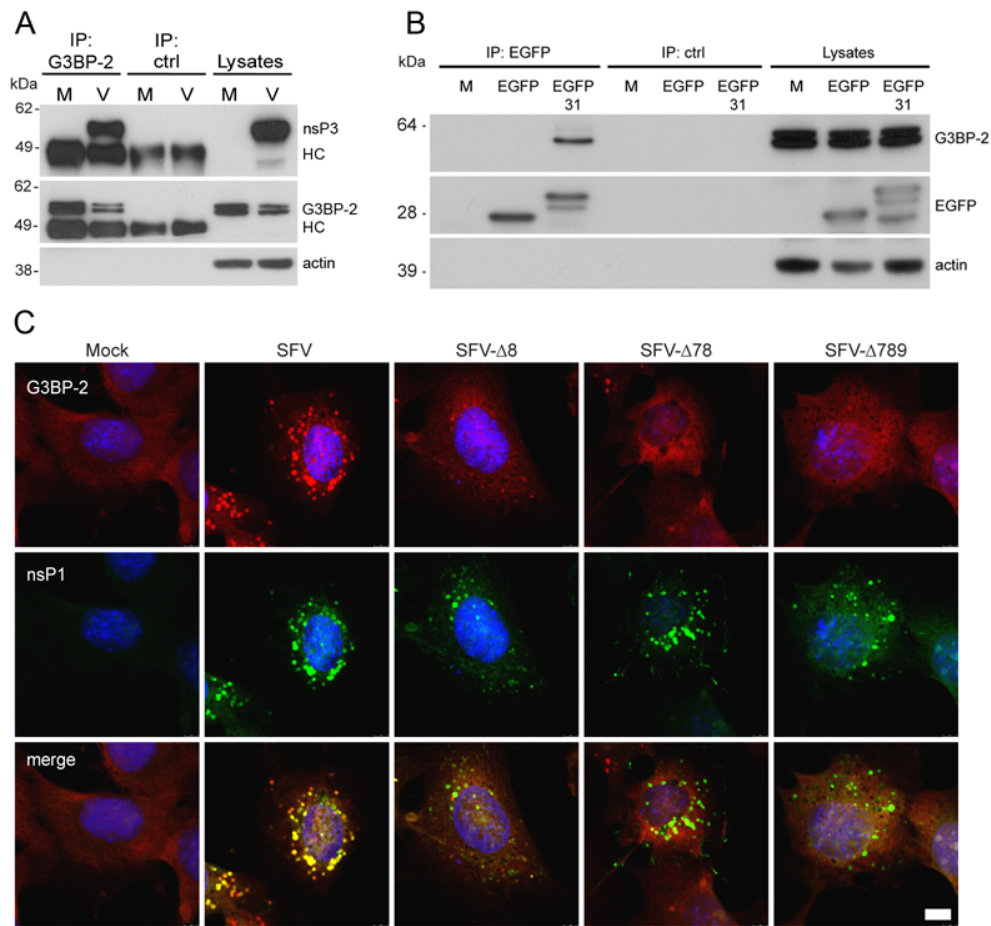

9

10

# **Figure S1. G3BP-2 interacts with the C-terminal 7 aa repeat motifs of SFV nsP3**

(A) BHK cells were infected at MOI 10 with SFV (V) or mock infected (M). At 8 hpi, cell lysates were prepared and immunoprecipitated (IP) with G3BP-2 antisera or control sera and separated by SDS-PAGE. Lysates and IPs were probed for nsP3, G3BP-2, and actin. The position of immunoglobulin heavy chain (HC) is indicated.

(B) BHK cells were mock transfected (M) or transfected with pCMV-EGFP or pEGFP-31. Cell lysates were prepared 16 hours after transfection and immunoprecipitated (IP) with EGFP or control antisera and separated by SDS-PAGE. Lysates and IPs were probed for G3BP-2, EGFP and actin. EGFP and actin panels are reproduced from figure 2D for clarity.

(C) MEFs were mock-infected or infected with SFV, SFV-Δ8, SFV-Δ78 or SFV-Δ789 (MOI 1). Cells were fixed at 8 hpi and stained for nsP1 and G3BP-2 and analysed by confocal microscopy. Bar 10 μm.

24

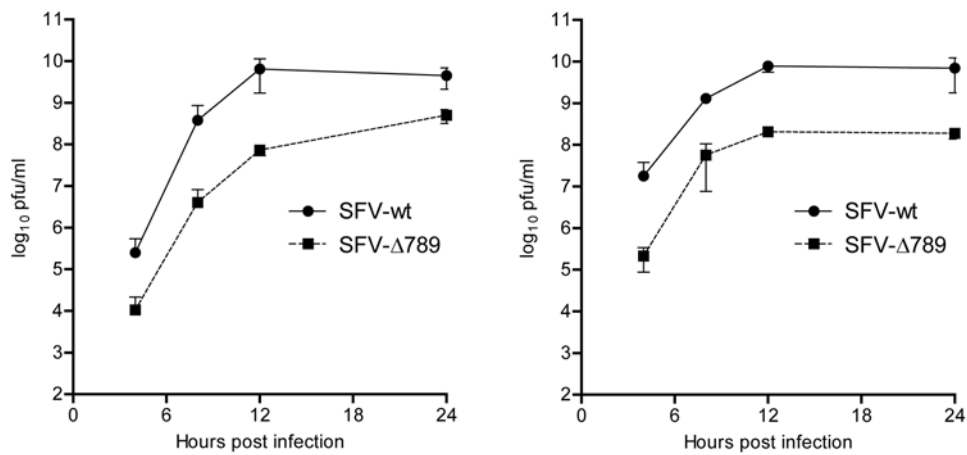

25

26

## 27 **Figure S2: SFV and SFV-Δ789 growth curves in BHK cells**

28 BHK cells were infected with SFV or SFVΔ789 at MOI 0.1 (left panel) or MOI 10 (right

29 panel). At 4, 8, 12 or 24 hpi supernatants were collected and SFV infectious units were

30 quantified by plaque assay on BHK cells. Data are means of 2 independent experiments

31 each titrated in duplicate. Error bars indicate SD.

32

33

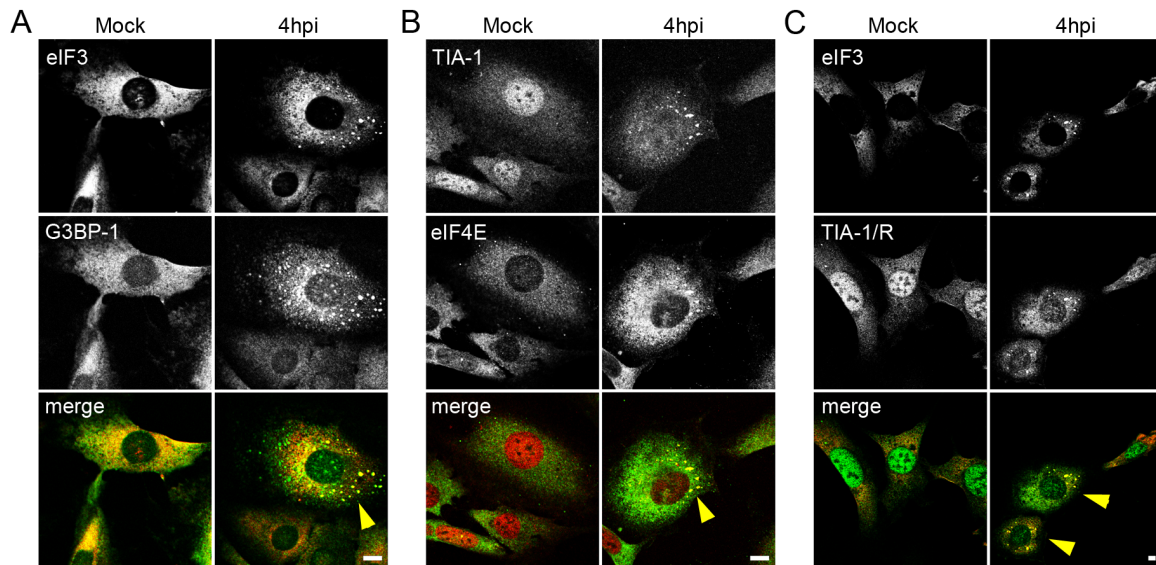

**Figure S3: SFV-induced SGs contain stalled translation initiation complexes.**

MEFs were infected at MOI 1 with wt SFV for 4 hours and fixed and stained for (A) G3BP-1 (green) and eIF3 (red), (B) TIA-1 (red) and eIF4E (green) and (C) TIA-1/R (green) and eIF3 (red) and analysed by confocal microscopy. Cells containing SFV infection-induced SGs are indicated with yellow arrowheads. Bar 10  $\mu$ m.

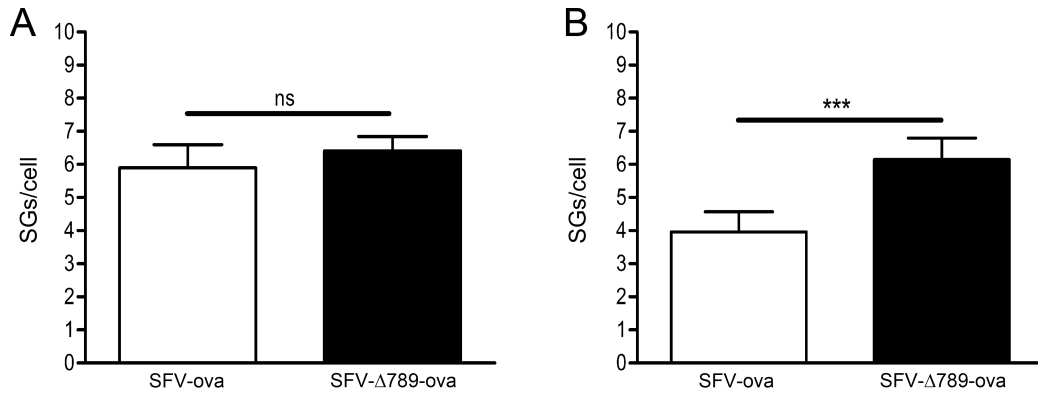

#### Figure S4: Quantification of SGs per cell

MEFs were infected at MOI 0.2 with SFV-ova or SFV-Δ789-ova. Cells were fixed at 4 hpi (A) or 8 hpi (B) and stained for TIA-1 and nsP3. The number of SGs per cell was quantified in 50 SG+ cells per condition. Data are presented as mean  $\pm$  SD from 4 (A) or 5 (B) independent experiments. Student's t test, \*\*\*= $p < 0.001$ .
